# Supplementary material for: A PROBID Hybrid Decision Model Based on Multi-Valued Neutrosophic Sets and Contact Numbers Integration
Source: Research Square preprint supplement (doi:10.21203/rs.3.rs-8318774/v1), 2025-12-31
Supplement: Supplementary file 1 [file 67b061b1180e7fdb62f4543e.docx]

**Summary of the tables in the manuscript on A PROBID Hybrid Decision Model Based on Multi-Valued Neutrosophic Sets and Contact Numbers**

**Table 1** Computation principles of ideal and average alternatives in PROBID method

| Alternative | Attribute 1 | Attribute 2 |
| --- | --- | --- |
| *A* | 3 | 8 |
| *B* | 7 | 10 |
| *C* | 5 | 6 |

**Table 2** The weight determination of the MVCN-PROBID method

| Attribute | EWM | AHP | Combination weight |
| --- | --- | --- | --- |
|  | 0.1058 | 0.1223 | 13.1% |
|  | 0.1038 | 0.0984 | 10.4% |
|  | 0.0920 | 0.0684 | 6.4% |
|  | 0.0845 | 0.2193 | 18.8% |
|  | 0.1062 | 0.1075 | 11.6% |
|  | 0.1189 | 0.0972 | 11.7% |
|  | 0.0832 | 0.0771 | 6.5% |
|  | 0.0843 | 0.0771 | 6.6% |
|  | 0.1039 | 0.0689 | 7.3% |
|  | 0.1173 | 0.0638 | 7.6% |

**Table 3** Determination of ideal and average schemes for agricultural drone case

| Attribute |  |  |  |  |
| --- | --- | --- | --- | --- |
|  | 0.8037+0.0211i+0.1752j | 0.4170+0.2117i+0.3713j | 0.1489+0.4535i+0.3976j | 0.4565+0.2288i+0.3147j |
|  | 0.5727+0.2965i+0.0127j | 0.2607+0.3774i+0.3619j | 0.2559+0.4146i+0.4476j | 0.3631+0.3629i+0.2740j |
|  | 0.7315+0.1432i+0.0497j | 0.2614+0.2188i+0.0670j | 0.0081+0.9249i+0.5954j | 0.3336+0.4290i+0.2374j |
|  | 0.5306+0.0054i+0.0078j | 0.3671+0.4530i+0.0164j | 0.3665+0.6257i+0.6275j | 0.4214+0.3614i+0.2172j |
|  | 0.5719+0.0202i+0.0035j | 0.4609+0.3668i+0.4079j | 0.0027+0.5356i+0.6305j | 0.3452+0.3075i+0.3473j |
|  | 0.9616+0.0227i+0.0139j | 0.4008+0.4042i+0.0157j | 0.0042+0.5853i+0.5916j | 0.4555+0.3374i+0.2071j |
|  | 0.5209+0.0145i+0.0321j | 0.3068+0.2748i+0.4184j | 0.0182+0.9497i+0.4646j | 0.2820+0.4130i+0.3050j |
|  | 0.6230+0.0017i+0.0512j | 0.4020+0.0072i+0.3698j | 0.0064+0.9424i+0.5962j | 0.3438+0.3171i+0.3391j |
|  | 0.9581+0.0029i+0.0124j | 0.3488+0.0295i+0.1573j | 0.1800+0.6627i+0.6483j | 0.4956+0.2317i+0.2727j |
|  | 0.5941+0.0048i+0.2759j | 0.3039+0.4202i+0.4011j | 0.0048+0.5238i+0.4714j | 0.3009+0.3163i+0.3828j |

**Table 4** Distance of agricultural drone alternatives to the ideal solution

| Alternative | *k*=1 | *k*=2 | *k*=3 |
| --- | --- | --- | --- |
|  | 0.9979 | 0.8255 | 1.5150 |
|  | 1.2772 | 0.9641 | 1.2789 |
|  | 1.3639 | 0.9128 | 1.0837 |

**Table 5** Distance of agricultural drone alternatives to the average solution

| Alternative |  |
| --- | --- |
|  | 0.8096 |
|  | 0.8544 |
|  | 0.7877 |

**Table 6** Determination of positive and negative ideal distances for the agricultural drone case

| Alternative |  |  |
| --- | --- | --- |
|  | 1.4107 | 1.9278 |
|  | 1.7592 | 1.7609 |
|  | 1.8203 | 15401 |

**Table 7** Positive and negative ideal ratios and performance scores of agricultural drone alternatives

| Alternative |  |  | Rank |
| --- | --- | --- | --- |
|  |  |  | 1 |
|  |  |  | 2 |
|  |  |  | 3 |

**Table 8** Determination of ideal and average solutions for the corporate investment case

| Attribute |  |  |  |
| --- | --- | --- | --- |
|  | 0.8205+0.0282i+0.1504j | 0.4075+0.0335i+0.2702j | 0.6019+0.0017i+0.3008j |
|  | 0.6807+0.0291i+0.2911j | 0.4075+0.3223i+0.2702j | 0.3808+0.3184i+0.3964j |
|  | 0.0065+0.5092i+0.4843j | 0.3879+0.3223i+0.2917j | 0.2371+0.3629i+0.4000j |
|  | 0.0051+0.5099i+0.4850j | 0.2444+0.4639i+0.5786j | 0.0016+0.5912i+0.4072j |
|  | 0.3782+0.2691i+0.3527j | 0.3618+0.2855i+0.3527j | 0.3054+0.3185i+0.3761j |

**Table 9** Distance of corporate investment alternatives to the ideal solution

| Alternative | *k*=1 | *k*=2 | *k*=3 | *k*=4 |
| --- | --- | --- | --- | --- |
|  | 0.6777 | 0.5558 | 0.2350 | 0.3232 |
|  | 0.5297 | 0.2697 | 0.5266 | 0.5379 |
|  | 0.6395 | 0.5534 | 0.3184 | 0.5133 |
|  | 0.2784 | 0.1271 | 0.5882 | 0.6781 |

**Table 10** Distance of corporate investment alternatives to the average solution

| Alternative |  |
| --- | --- |
|  | 0.3352 |
|  | 0.3323 |
|  | 0.3878 |
|  | 0.3244 |

**Table 11** Determination of positive and negative ideal distances for the corporate investment case

| Alternative |  |  |
| --- | --- | --- |
|  | 0.9556 | 0.4407 |
|  | 0.6646 | 0.8012 |
|  | 0.9163 | 0.6725 |
|  | 0.3420 | 0.9722 |

**Table 12** Positive and negative ideal ratios and performance scores of corporate investment alternatives

| Alternative |  |  | Rank |
| --- | --- | --- | --- |
|  |  |  | 4 |
|  |  |  | 2 |
|  |  |  | 3 |
|  |  |  | 1 |

**Table 13** Dynamic attribute screening of MVCN-PROBID method

| Weight scheme |  |  |  |  |  |  |  |  |  |  |
| --- | --- | --- | --- | --- | --- | --- | --- | --- | --- | --- |
| Original | 0.131 | 0.104 | 0.064 | 0.188 | 0.116 | 0.117 | 0.065 | 0.066 | 0.073 | 0.076 |
| Set 1 | 0.140 | 0.111 | Removed | 0.201 | 0.124 | 0.125 | 0.069 | 0.071 | 0.078 | 0.081 |
| Set 2 | 0.150 | 0.119 | — | 0.216 | 0.133 | 0.135 | Removed | 0.076 | 0.084 | 0.087 |
| Set 3 | 0.162 | 0.129 | — | 0.234 | 0.144 | 0.146 | — | Removed | 0.091 | 0.094 |
| Set 4 | 0.178 | 0.142 | — | 0.257 | 0.158 | 0.161 | — | — | Removed | 0.104 |
| Set 5 | 0.199 | 0.158 | — | 0.287 | 0.176 | 0.180 | — | — | — | Removed |
| Set 6 | 0.236 | Removed | — | 0.341 | 0.209 | 0.214 | — | — | — | — |
| Set 7 | 0.298 | — | — | 0.431 | Removed | 0.271 | — | — | — | — |
| Set 8 | 0.409 | — | — | 0.591 | — | Removed | — | — | — | — |

**Table 14** The performance scores and ranking of alternatives under dynamic attribute screening

| Weight scheme |  |  |  | Rank |
| --- | --- | --- | --- | --- |
| Set 1 | 1.4301 | 1.2514 | 1.1448 |  |
| Set 2 | 1.3538 | 1.1934 | 1.1163 |  |
| Set 3 | 1.2659 | 1.1056 | 0.9978 |  |
| Set 4 | 1.0961 | 1.0735 | 0.9444 |  |
| Set 5 | 0.9861 | 1.0910 | 0.9471 |  |
| Set 6 | 0.9964 | 1.1090 | 0.8683 |  |
| Set 7 | 0.8842 | 1.1720 | 0.7156 |  |
| Set 8 | 1.0604 | 0.7832 | 0.6043 |  |

**Table 15** The weight adjustment process of attribute

| Adjustment process |  |  |  |  |  |  |  |  |  |  | Rank |
| --- | --- | --- | --- | --- | --- | --- | --- | --- | --- | --- | --- |
| 1 | 0 | 0.111 | 0.111 | 0.111 | 0.111 | 0.111 | 0.111 | 0.111 | 0.111 | 0.112 |  |
| 2 | 0.1 | 0.100 | 0.100 | 0.100 | 0.100 | 0.100 | 0.100 | 0.100 | 0.100 | 0.100 |  |
| 3 | 0.2 | 0.088 | 0.088 | 0.088 | 0.088 | 0.088 | 0.088 | 0.088 | 0.088 | 0.096 |  |
| 4 | 0.3 | 0.077 | 0.077 | 0.077 | 0.077 | 0.077 | 0.077 | 0.077 | 0.077 | 0.084 |  |
| 5 | 0.4 | 0.066 | 0.066 | 0.066 | 0.066 | 0.066 | 0.066 | 0.066 | 0.066 | 0.072 |  |
| 6 | 0.5 | 0.055 | 0.055 | 0.055 | 0.055 | 0.055 | 0.055 | 0.055 | 0.055 | 0.060 |  |
| 7 | 0.6 | 0.044 | 0.044 | 0.044 | 0.044 | 0.044 | 0.044 | 0.044 | 0.044 | 0.048 |  |
| 8 | 0.7 | 0.033 | 0.033 | 0.033 | 0.033 | 0.033 | 0.033 | 0.033 | 0.033 | 0.036 |  |
| 9 | 0.8 | 0.022 | 0.022 | 0.022 | 0.022 | 0.022 | 0.022 | 0.022 | 0.022 | 0.024 |  |
| 10 | 0.9 | 0.011 | 0.011 | 0.011 | 0.011 | 0.011 | 0.011 | 0.011 | 0.011 | 0.012 |  |
| 11 | 1 | 0 | 0 | 0 | 0 | 0 | 0 | 0 | 0 | 0 |  |

**Table 16** The ranking of alternatives under 110 weight conditions

| Rank | Sum | Frequency |
| --- | --- | --- |
|  | 102 | 92.7% |
|  | 3 | 2.7% |
|  | 2 | 1.8% |
|  | 1 | 0.9% |
|  | 2 | 1.8% |
|  |  |  |

**Table 17** Comparison of the ranking results of seven MADM methods

| Serial Number | Methods | Rank |
| --- | --- | --- |
| 1 | MVCN-PROBID |  |
| 2 | MVNSs&EDAS |  |
| 3 | MVNSs&TOPSIS |  |
| 4 | MVNSs&VIKOR |  |
| 5 | MVNSs&TODIM |  |
| 6 | MVNNWA |  |
| 7 | MVNNWG |  |
