# Supplementary material for: A PROBID Hybrid Decision Model Based on Multi-Valued Neutrosophic Sets and Contact Numbers Integration
Source: Research Square preprint supplement (doi:10.21203/rs.3.rs-8318774/v1), 2025-12-31
Supplement: Supplementary file 2 [file 95e5c323b10daa38487c60f7.xlsx]

## Sheet: Sheet1
110 types of attribute weight adjustment situations
Adjustment process	Flight speed	Endurance time	Service life	Autonomous navigation capability	Payload capacity	Energy accessibility	Geographical environment adaptability	Climatic environment resilience	Market price	After-Sales service
1	0	0.111	0.111	0.111	0.111	0.111	0.111	0.111	0.111	0.112
2	0.1	0.1	0.1	0.1	0.1	0.1	0.1	0.1	0.1	0.1
3	0.2	0.088	0.088	0.088	0.088	0.088	0.088	0.088	0.088	0.096
4	0.3	0.077	0.077	0.077	0.077	0.077	0.077	0.077	0.077	0.084
5	0.4	0.066	0.066	0.066	0.066	0.066	0.066	0.066	0.066	0.072
6	0.5	0.055	0.055	0.055	0.055	0.055	0.055	0.055	0.055	0.06
7	0.6	0.044	0.044	0.044	0.044	0.044	0.044	0.044	0.044	0.048
8	0.7	0.033	0.033	0.033	0.033	0.033	0.033	0.033	0.033	0.036
9	0.8	0.022	0.022	0.022	0.022	0.022	0.022	0.022	0.022	0.024
10	0.9	0.011	0.011	0.011	0.011	0.011	0.011	0.011	0.011	0.012
11	1	0	0	0	0	0	0	0	0	0
12	0.111	0	0.111	0.111	0.111	0.111	0.111	0.111	0.111	0.112
13	0.1	0.1	0.1	0.1	0.1	0.1	0.1	0.1	0.1	0.1
14	0.088	0.2	0.088	0.088	0.088	0.088	0.088	0.088	0.088	0.096
15	0.077	0.3	0.077	0.077	0.077	0.077	0.077	0.077	0.077	0.084
16	0.066	0.4	0.066	0.066	0.066	0.066	0.066	0.066	0.066	0.072
17	0.055	0.5	0.055	0.055	0.055	0.055	0.055	0.055	0.055	0.06
18	0.044	0.6	0.044	0.044	0.044	0.044	0.044	0.044	0.044	0.048
19	0.033	0.7	0.033	0.033	0.033	0.033	0.033	0.033	0.033	0.036
20	0.022	0.8	0.022	0.022	0.022	0.022	0.022	0.022	0.022	0.024
21	0.011	0.9	0.011	0.011	0.011	0.011	0.011	0.011	0.011	0.012
22	0	1	0	0	0	0	0	0	0	0
23	0.111	0.111	0	0.111	0.111	0.111	0.111	0.111	0.111	0.112
24	0.1	0.1	0.1	0.1	0.1	0.1	0.1	0.1	0.1	0.1
25	0.088	0.088	0.2	0.088	0.088	0.088	0.088	0.088	0.088	0.096
26	0.077	0.077	0.3	0.077	0.077	0.077	0.077	0.077	0.077	0.084
27	0.066	0.066	0.4	0.066	0.066	0.066	0.066	0.066	0.066	0.072
28	0.055	0.055	0.5	0.055	0.055	0.055	0.055	0.055	0.055	0.06
29	0.044	0.044	0.6	0.044	0.044	0.044	0.044	0.044	0.044	0.048
30	0.033	0.033	0.7	0.033	0.033	0.033	0.033	0.033	0.033	0.036
31	0.022	0.022	0.8	0.022	0.022	0.022	0.022	0.022	0.022	0.024
32	0.011	0.011	0.9	0.011	0.011	0.011	0.011	0.011	0.011	0.012
33	0	0	1	0	0	0	0	0	0	0
34	0.111	0.111	0.111	0	0.111	0.111	0.111	0.111	0.111	0.112
35	0.1	0.1	0.1	0.1	0.1	0.1	0.1	0.1	0.1	0.1
36	0.088	0.088	0.088	0.2	0.088	0.088	0.088	0.088	0.088	0.096
37	0.077	0.077	0.077	0.3	0.077	0.077	0.077	0.077	0.077	0.084
38	0.066	0.066	0.066	0.4	0.066	0.066	0.066	0.066	0.066	0.072
39	0.055	0.055	0.055	0.5	0.055	0.055	0.055	0.055	0.055	0.06
40	0.044	0.044	0.044	0.6	0.044	0.044	0.044	0.044	0.044	0.048
41	0.033	0.033	0.033	0.7	0.033	0.033	0.033	0.033	0.033	0.036
42	0.022	0.022	0.022	0.8	0.022	0.022	0.022	0.022	0.022	0.024
43	0.011	0.011	0.011	0.9	0.011	0.011	0.011	0.011	0.011	0.012
44	0	0	0	1	0	0	0	0	0	0
45	0.111	0.111	0.111	0.111	0	0.111	0.111	0.111	0.111	0.112
46	0.1	0.1	0.1	0.1	0.1	0.1	0.1	0.1	0.1	0.1
47	0.088	0.088	0.088	0.088	0.2	0.088	0.088	0.088	0.088	0.096
48	0.077	0.077	0.077	0.077	0.3	0.077	0.077	0.077	0.077	0.084
49	0.066	0.066	0.066	0.066	0.4	0.066	0.066	0.066	0.066	0.072
50	0.055	0.055	0.055	0.055	0.5	0.055	0.055	0.055	0.055	0.06
51	0.044	0.044	0.044	0.044	0.6	0.044	0.044	0.044	0.044	0.048
52	0.033	0.033	0.033	0.033	0.7	0.033	0.033	0.033	0.033	0.036
53	0.022	0.022	0.022	0.022	0.8	0.022	0.022	0.022	0.022	0.024
54	0.011	0.011	0.011	0.011	0.9	0.011	0.011	0.011	0.011	0.012
55	0	0	0	0	1	0	0	0	0	0
56	0.111	0.111	0.111	0.111	0.111	0	0.111	0.111	0.111	0.112
57	0.1	0.1	0.1	0.1	0.1	0.1	0.1	0.1	0.1	0.1
58	0.088	0.088	0.088	0.088	0.088	0.2	0.088	0.088	0.088	0.096
59	0.077	0.077	0.077	0.077	0.077	0.3	0.077	0.077	0.077	0.084
60	0.066	0.066	0.066	0.066	0.066	0.4	0.066	0.066	0.066	0.072
61	0.055	0.055	0.055	0.055	0.055	0.5	0.055	0.055	0.055	0.06
62	0.044	0.044	0.044	0.044	0.044	0.6	0.044	0.044	0.044	0.048
63	0.033	0.033	0.033	0.033	0.033	0.7	0.033	0.033	0.033	0.036
64	0.022	0.022	0.022	0.022	0.022	0.8	0.022	0.022	0.022	0.024
65	0.011	0.011	0.011	0.011	0.011	0.9	0.011	0.011	0.011	0.012
66	0	0	0	0	0	1	0	0	0	0
67	0.111	0.111	0.111	0.111	0.111	0.111	0	0.111	0.111	0.112
68	0.1	0.1	0.1	0.1	0.1	0.1	0.1	0.1	0.1	0.1
69	0.088	0.088	0.088	0.088	0.088	0.088	0.2	0.088	0.088	0.096
70	0.077	0.077	0.077	0.077	0.077	0.077	0.3	0.077	0.077	0.084
71	0.066	0.066	0.066	0.066	0.066	0.066	0.4	0.066	0.066	0.072
72	0.055	0.055	0.055	0.055	0.055	0.055	0.5	0.055	0.055	0.06
73	0.044	0.044	0.044	0.044	0.044	0.044	0.6	0.044	0.044	0.048
74	0.033	0.033	0.033	0.033	0.033	0.033	0.7	0.033	0.033	0.036
75	0.022	0.022	0.022	0.022	0.022	0.022	0.8	0.022	0.022	0.024
76	0.011	0.011	0.011	0.011	0.011	0.011	0.9	0.011	0.011	0.012
77	0	0	0	0	0	0	1	0	0	0
78	0.111	0.111	0.111	0.111	0.111	0.111	0.111	0	0.111	0.112
79	0.1	0.1	0.1	0.1	0.1	0.1	0.1	0.1	0.1	0.1
80	0.088	0.088	0.088	0.088	0.088	0.088	0.088	0.2	0.088	0.096
81	0.077	0.077	0.077	0.077	0.077	0.077	0.077	0.3	0.077	0.084
82	0.066	0.066	0.066	0.066	0.066	0.066	0.066	0.4	0.066	0.072
83	0.055	0.055	0.055	0.055	0.055	0.055	0.055	0.5	0.055	0.06
84	0.044	0.044	0.044	0.044	0.044	0.044	0.044	0.6	0.044	0.048
85	0.033	0.033	0.033	0.033	0.033	0.033	0.033	0.7	0.033	0.036
86	0.022	0.022	0.022	0.022	0.022	0.022	0.022	0.8	0.022	0.024
87	0.011	0.011	0.011	0.011	0.011	0.011	0.011	0.9	0.011	0.012
88	0	0	0	0	0	0	0	1	0	0
89	0.111	0.111	0.111	0.111	0.111	0.111	0.111	0.111	0	0.112
90	0.1	0.1	0.1	0.1	0.1	0.1	0.1	0.1	0.1	0.1
91	0.088	0.088	0.088	0.088	0.088	0.088	0.088	0.088	0.2	0.096
92	0.077	0.077	0.077	0.077	0.077	0.077	0.077	0.077	0.3	0.084
93	0.066	0.066	0.066	0.066	0.066	0.066	0.066	0.066	0.4	0.072
94	0.055	0.055	0.055	0.055	0.055	0.055	0.055	0.055	0.5	0.06
95	0.044	0.044	0.044	0.044	0.044	0.044	0.044	0.044	0.6	0.048
96	0.033	0.033	0.033	0.033	0.033	0.033	0.033	0.033	0.7	0.036
97	0.022	0.022	0.022	0.022	0.022	0.022	0.022	0.022	0.8	0.024
98	0.011	0.011	0.011	0.011	0.011	0.011	0.011	0.011	0.9	0.012
99	0	0	0	0	0	0	0	0	1	0
100	0.111	0.111	0.111	0.111	0.111	0.111	0.111	0.111	0.112	0
101	0.1	0.1	0.1	0.1	0.1	0.1	0.1	0.1	0.1	0.1
102	0.088	0.088	0.088	0.088	0.088	0.088	0.088	0.088	0.096	0.2
103	0.077	0.077	0.077	0.077	0.077	0.077	0.077	0.077	0.084	0.3
104	0.066	0.066	0.066	0.066	0.066	0.066	0.066	0.066	0.072	0.4
105	0.055	0.055	0.055	0.055	0.055	0.055	0.055	0.055	0.06	0.5
106	0.044	0.044	0.044	0.044	0.044	0.044	0.044	0.044	0.048	0.6
107	0.033	0.033	0.033	0.033	0.033	0.033	0.033	0.033	0.036	0.7
108	0.022	0.022	0.022	0.022	0.022	0.022	0.022	0.022	0.024	0.8
109	0.011	0.011	0.011	0.011	0.011	0.011	0.011	0.011	0.012	0.9
110	0	0	0	0	0	0	0	0	0	1
